# Supplementary material
Source: PubMed Central journal article supplement (PMC4201038)

Figure S4.

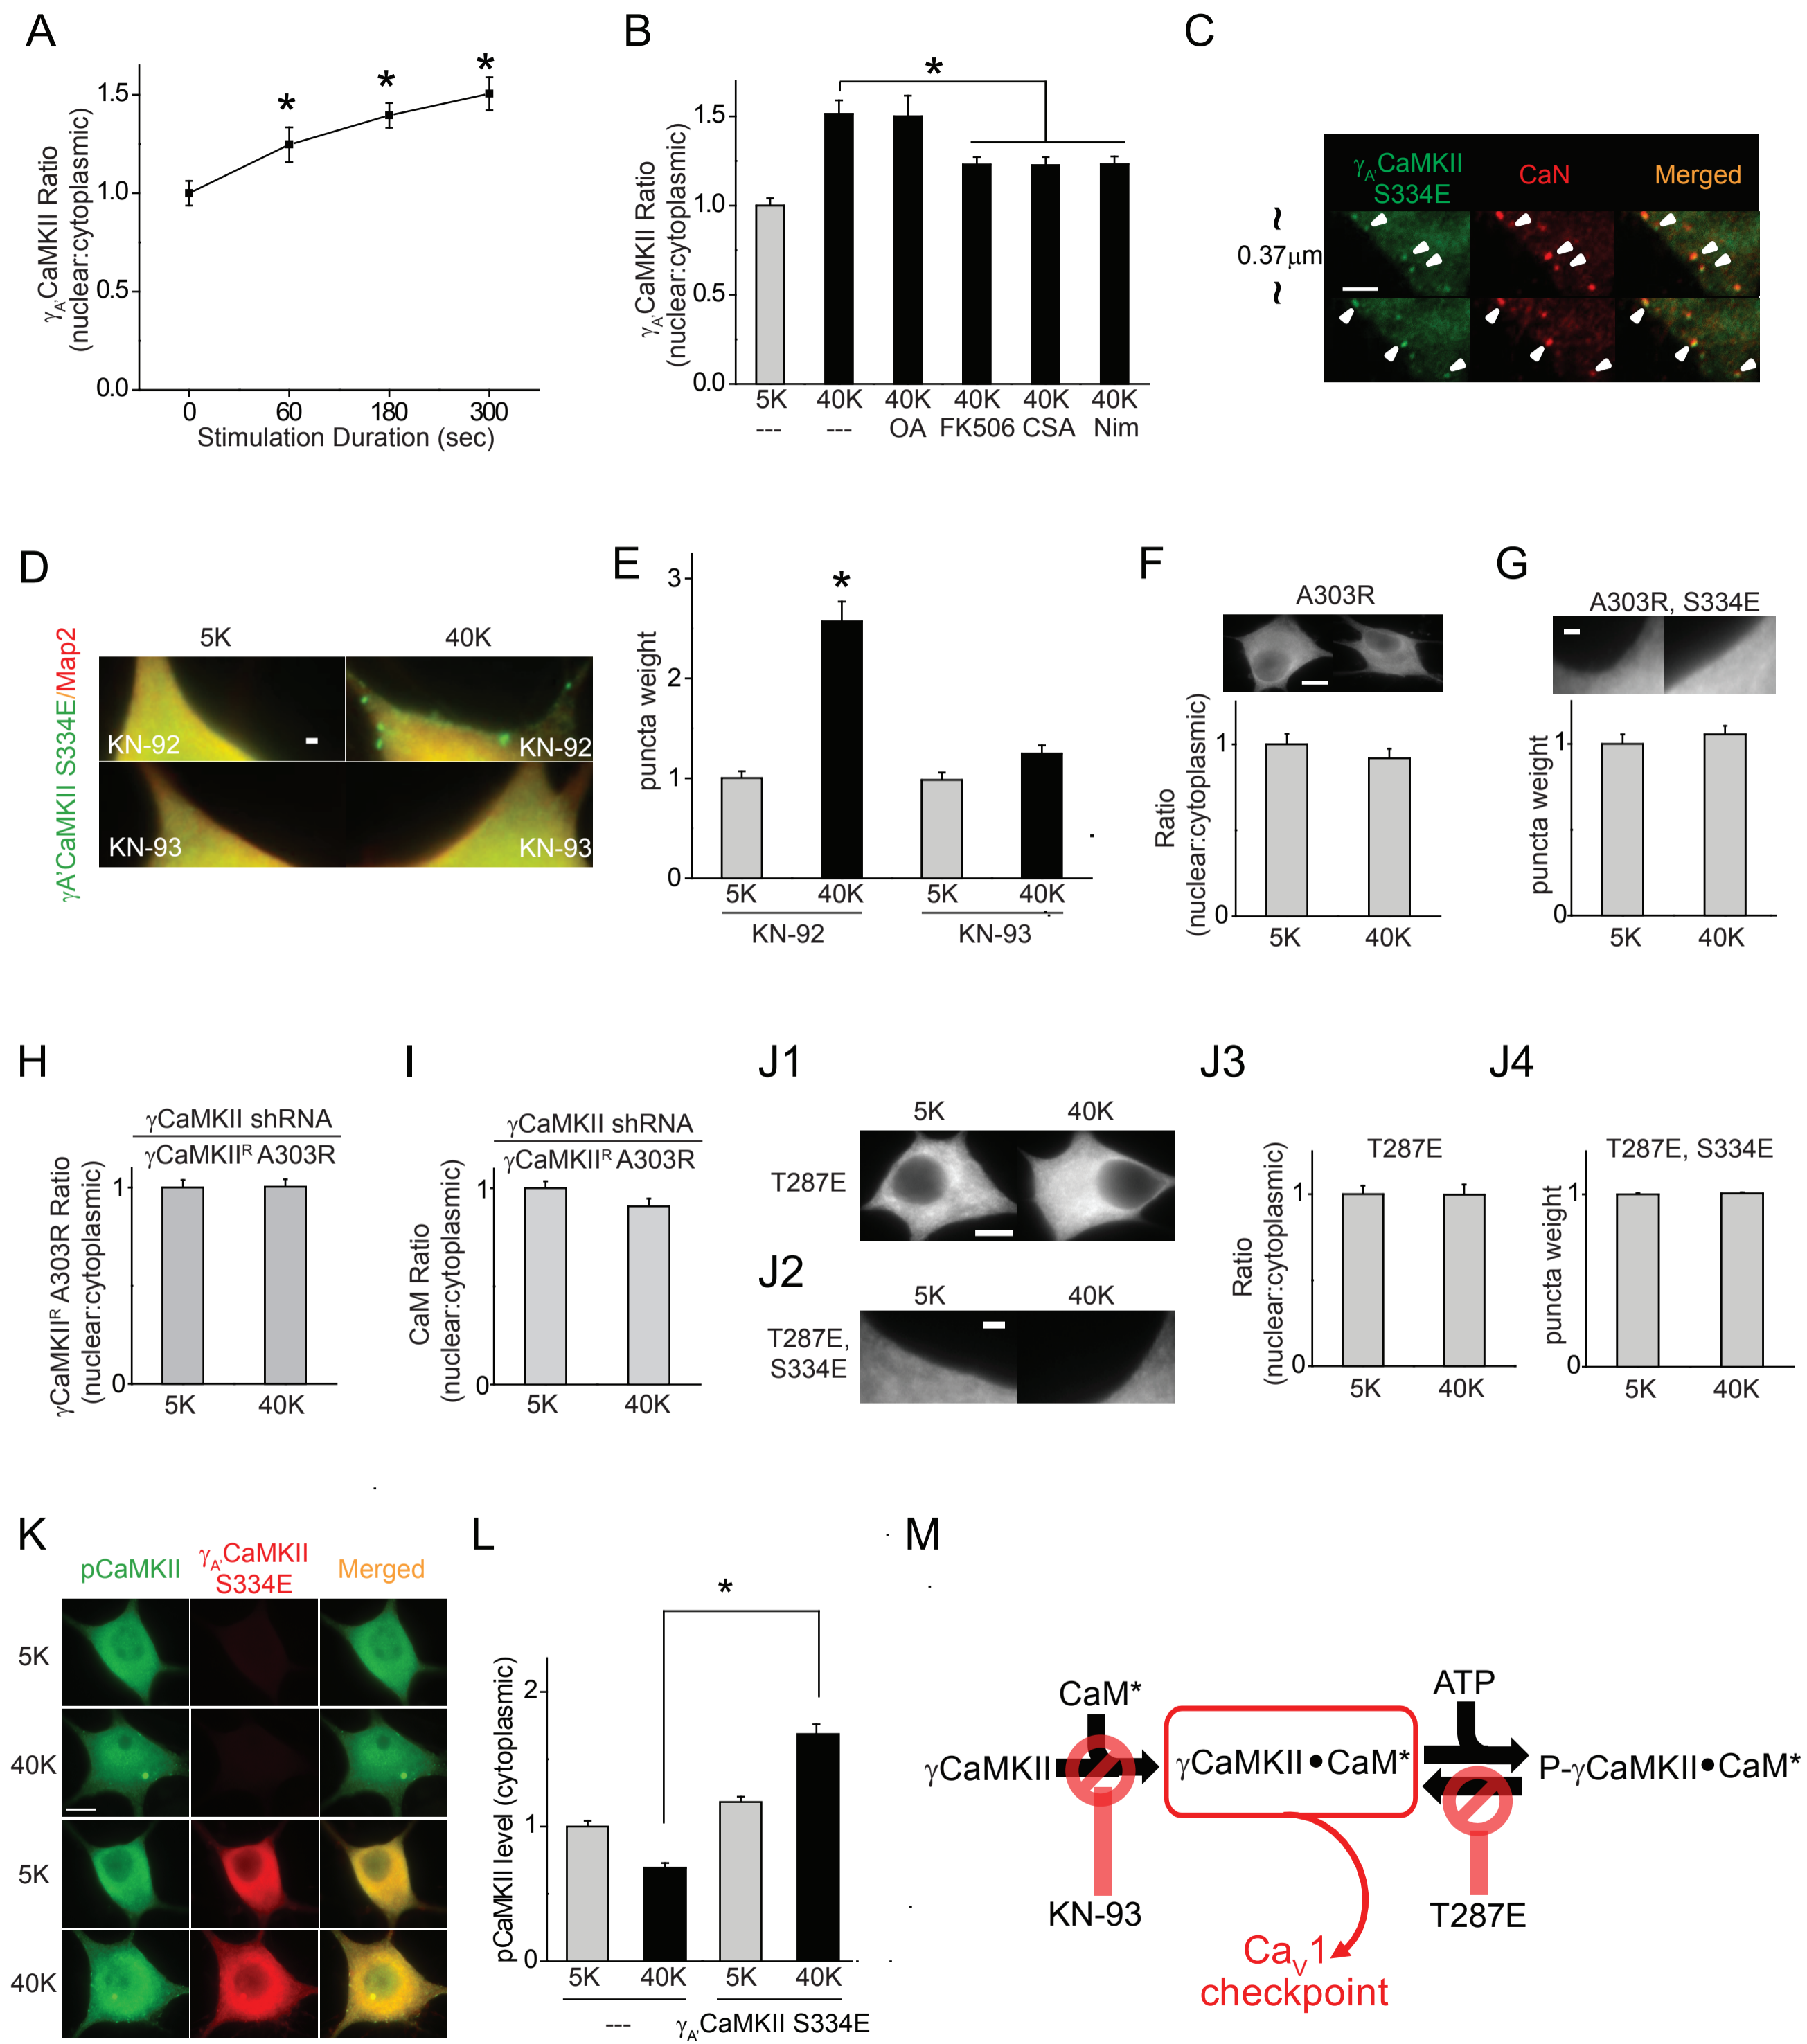

Supplement: NIHMS628839-supplement-5.pdf [file NIHMS628839-supplement-5.pdf]

Figure S5.

**A**

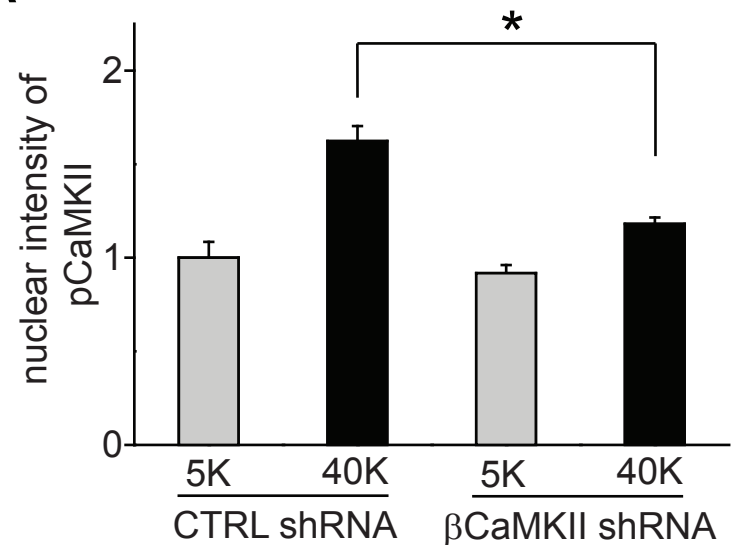

**B**

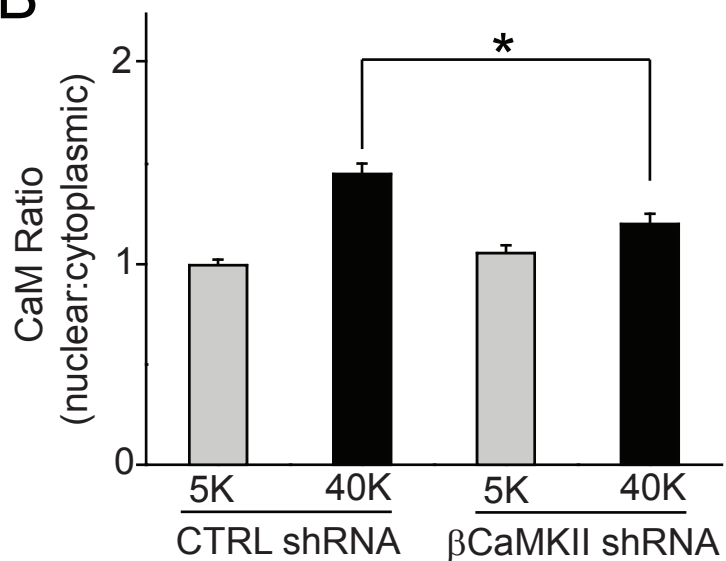

**C**

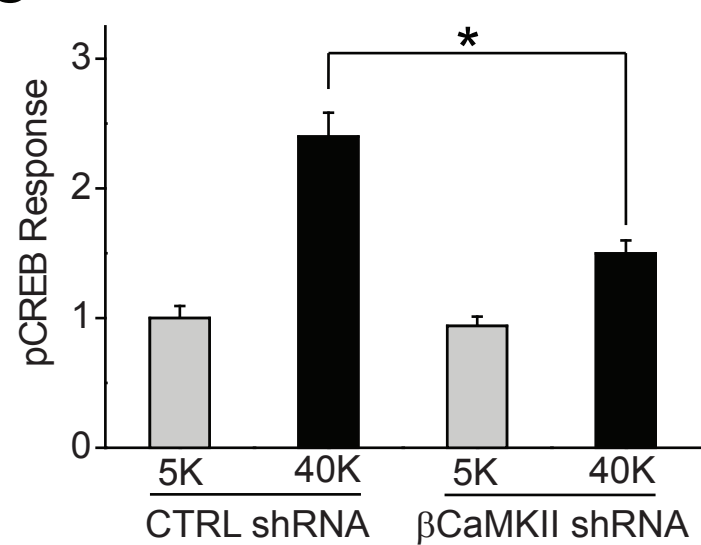

**D**

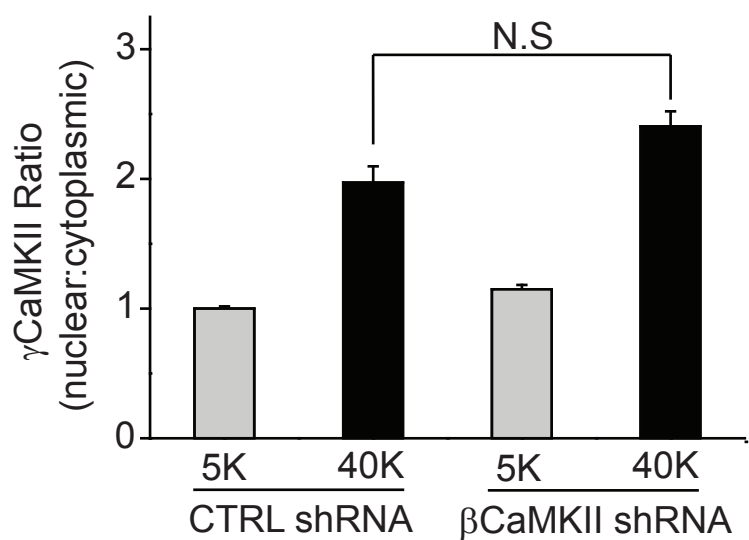

**E**

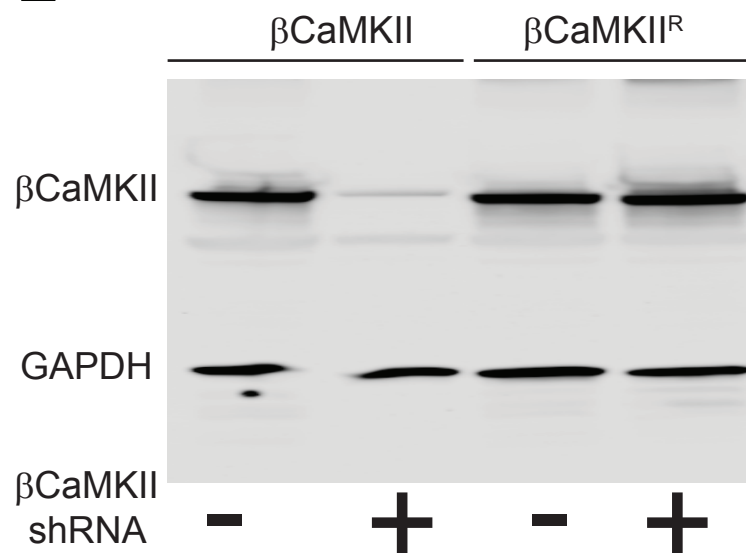

**F**

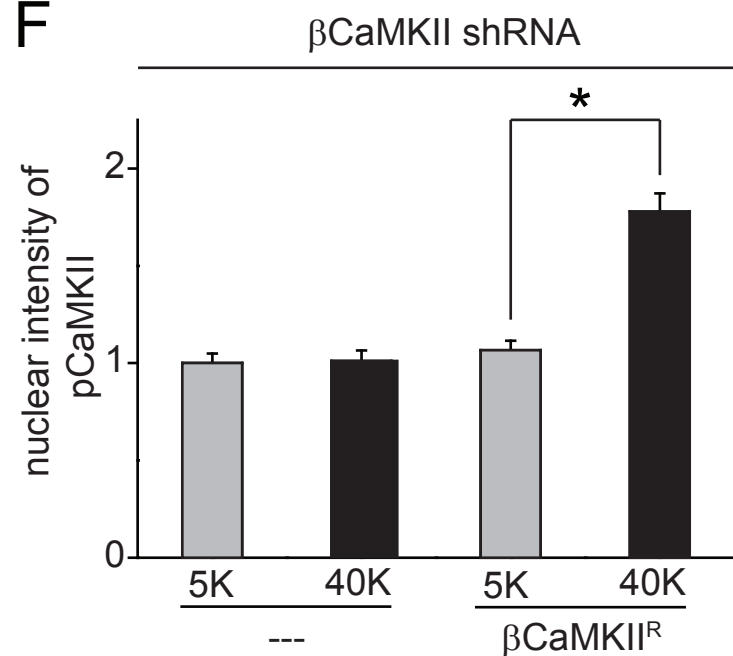

**G**

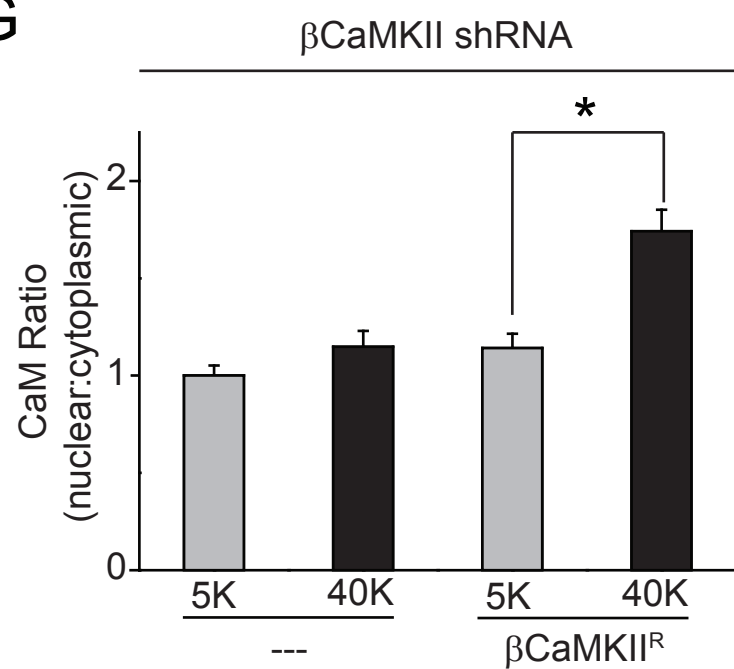

**H**

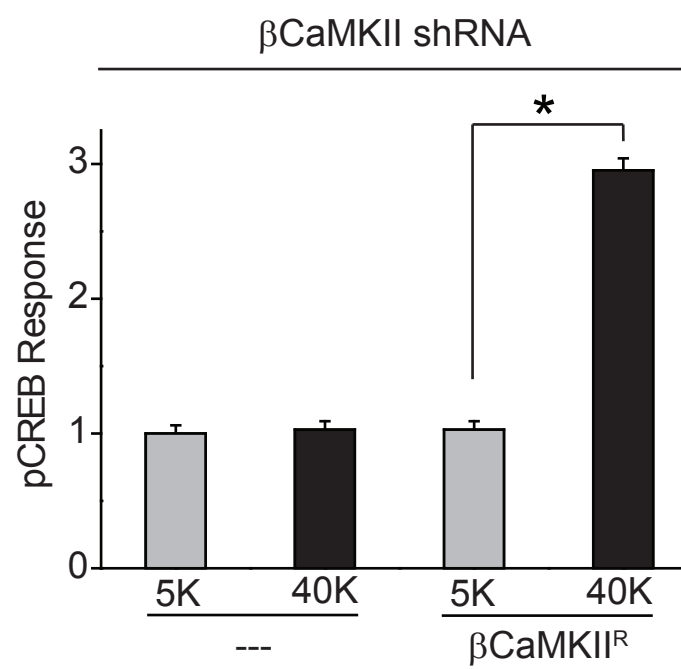

**I**

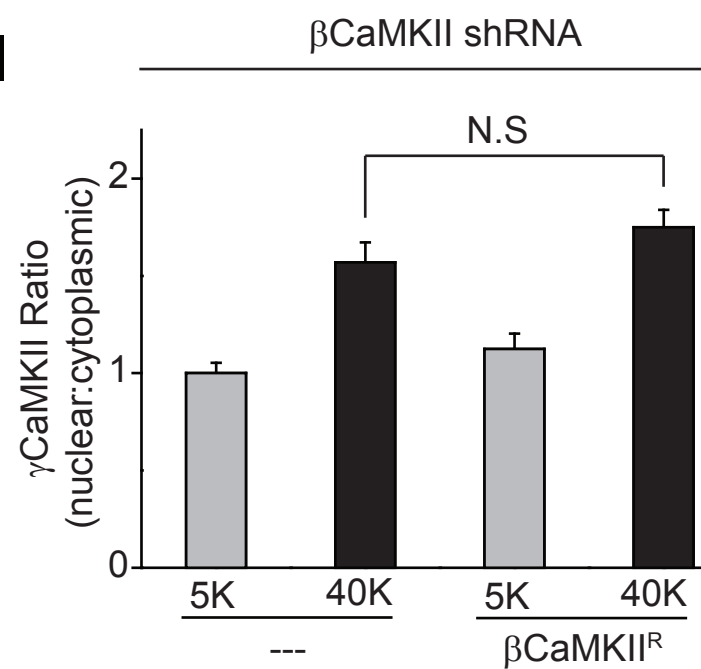

Supplement: NIHMS628839-supplement-6.pdf [file NIHMS628839-supplement-6.pdf]

Figure S6.

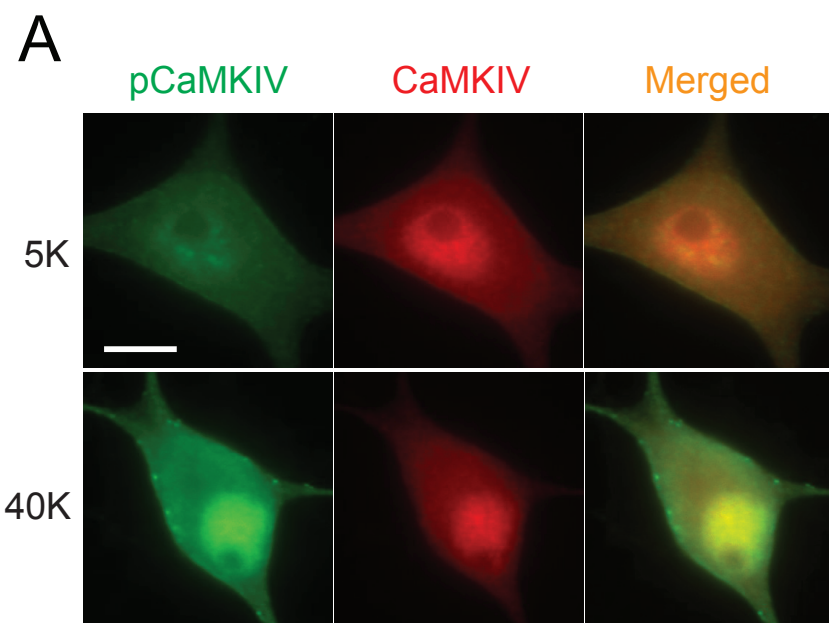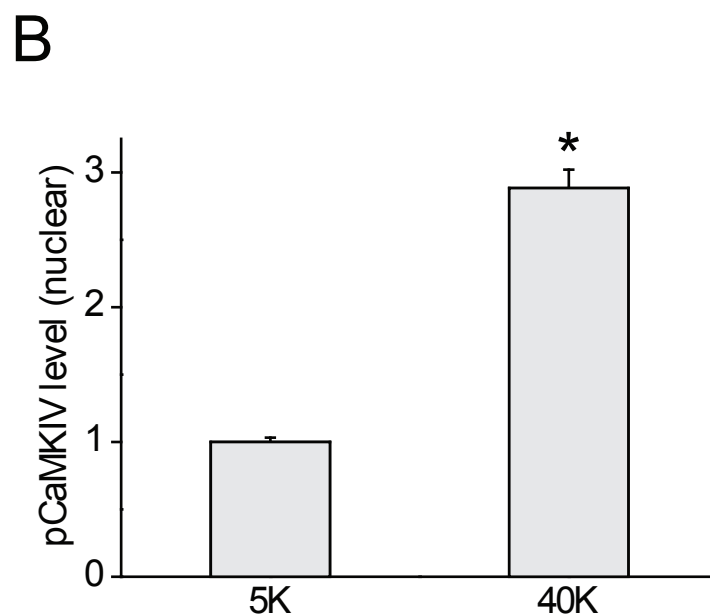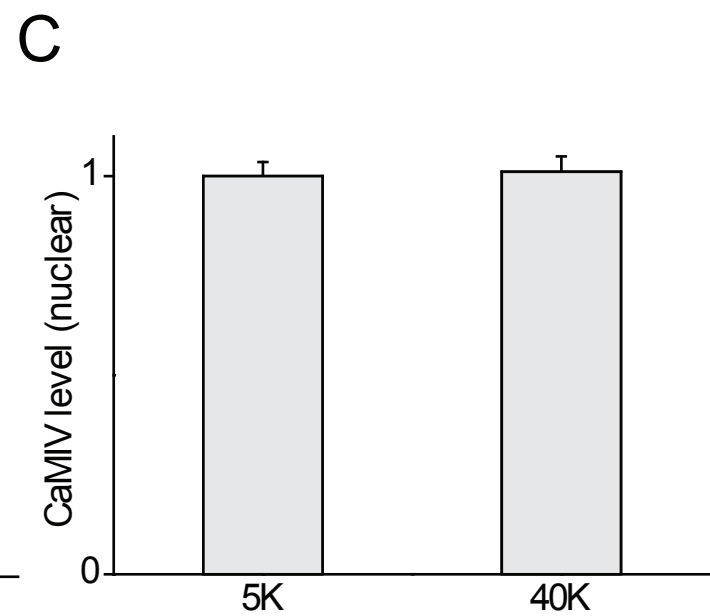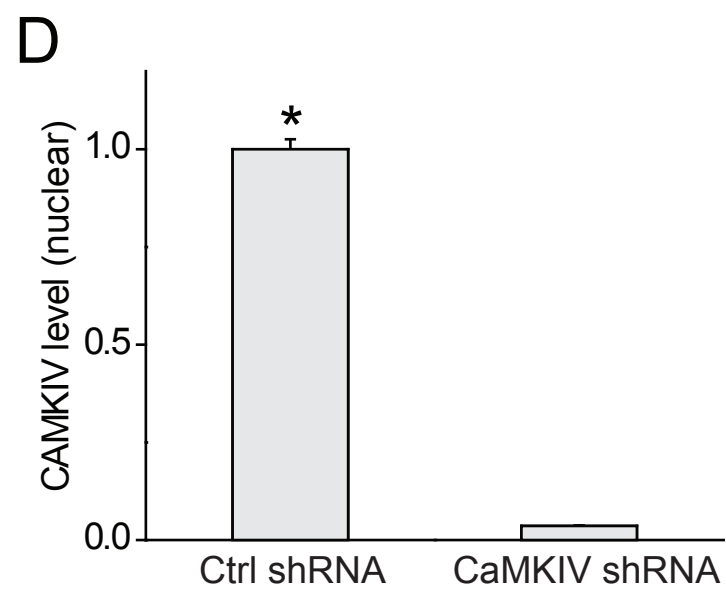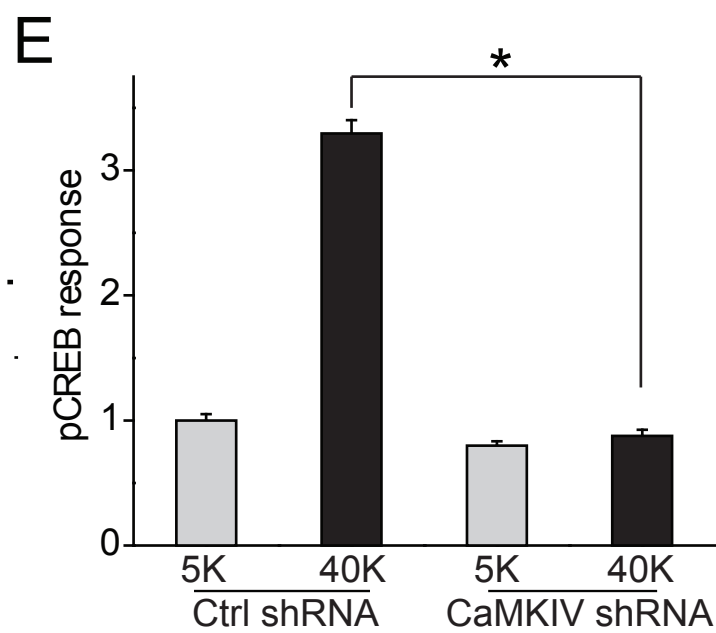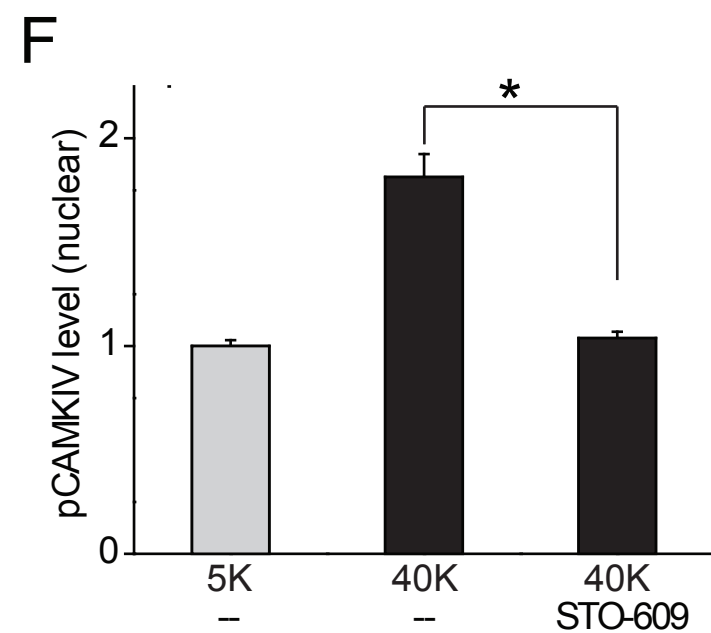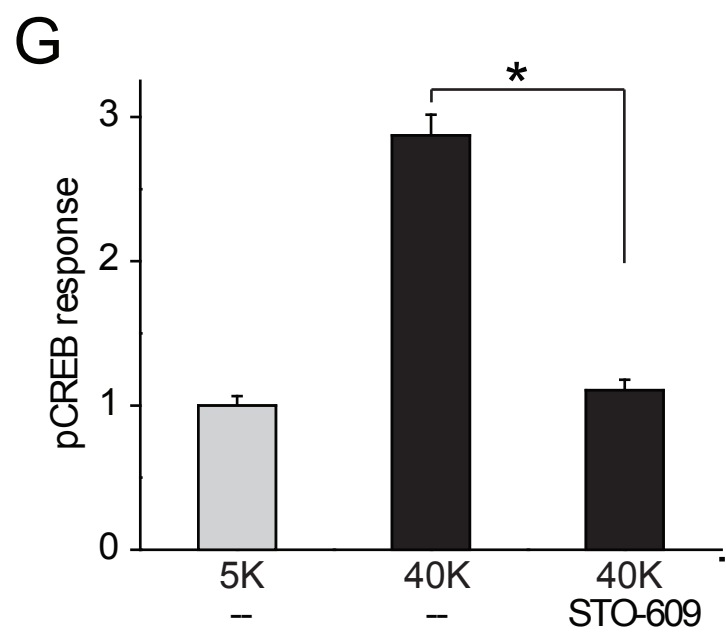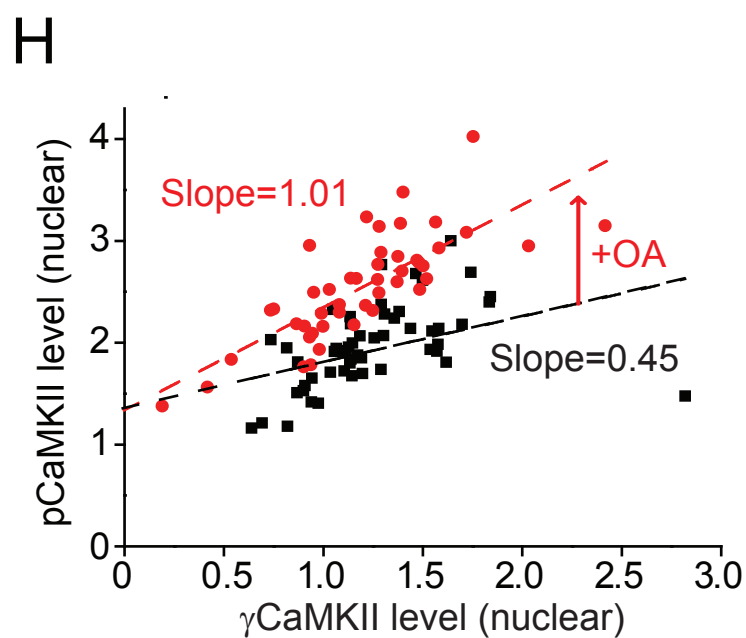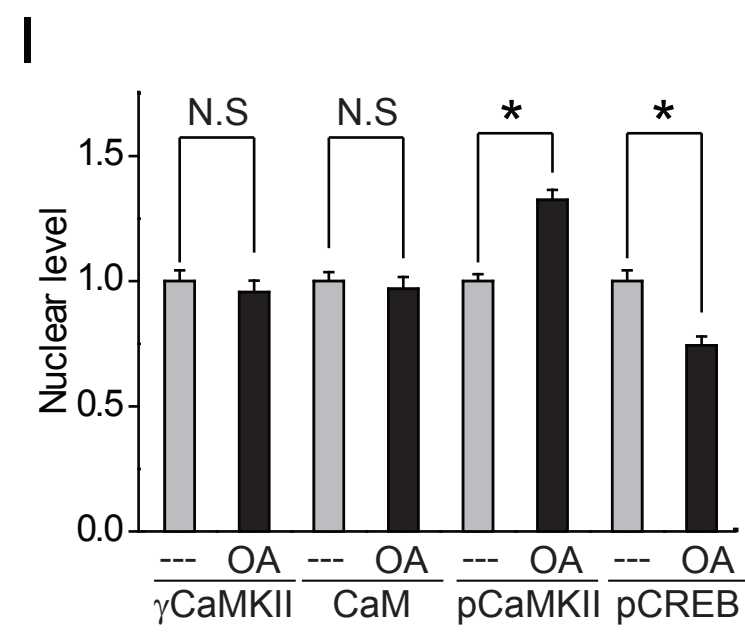

Supplement: NIHMS628839-supplement-7.pdf [file NIHMS628839-supplement-7.pdf]
